# Supplementary material for: Time-dependent DFT study of the K-edge spectra of vanadium and titanium complexes: effects of chloride ligands on pre-edge features
Source: Royal Society of Chemistry journal article supplement (doi:10.1039/c9cp05891e), 2019-12-03
Supplement: c9cp05891e1.pdf [file c9cp05891e1.pdf]

## Electronic Supplementary Information (ESI)

### **Time-dependent DFT study of K-edge spectra for vanadium and titanium complexes: Effects of chloride ligands on pre-edge features**

Jun Yi,<sup>1</sup> Naoki Nakatani,<sup>1,\*</sup> Kotohiro Nomura,<sup>1</sup> and Masahiko Hada<sup>1</sup>

<sup>1</sup>*Department of Chemistry, Faculty and Graduate School of Science, Tokyo*

*Metropolitan University, Hachioji, Tokyo 192-0397, Japan*

E-mail: [naokin@tmu.ac.jp](mailto:naokin@tmu.ac.jp)

### Peak broadening using pseudo Voigt function

To compare the calculated K-edge spectra with the experiments, we estimated peak broadening based on the pseudo-Voigt broadening scheme. The pseudo-Voigt function is an approximation of the Voigt profile. It is often used for calculations of experimental spectral line shapes. The normalized pseudo-Voigt function is of a form

$$V_p(x) = (1 - \eta) \cdot G(x) + \eta \cdot L(x) \quad (1)$$

where  $G(x)$  and  $L(x)$  are the normalized Gaussian and Lorentzian functions, the  $\eta$  is a parameter which mixes the two functions. The normalized Gaussian and Lorentzian functions are given by

$$G(x) = \frac{1}{c\sqrt{2\pi}} e^{-\frac{x^2}{2c^2}} \quad \text{where} \quad c = \frac{f}{2\sqrt{2\ln 2}} \quad (2)$$

$$L(x) = \frac{f}{2\pi x^2 + 0.25 \times f^2} \quad (3)$$

Here, we employed the same full width at half maximum (FWHM), denoted as  $f$ , for both Gaussian and Lorentzian profiles in the pseudo-Voigt function and for all the peaks in the pre-edge region.

**Table S1.** The root-mean-square error ( $\varphi$ ) between the experimental and calculated geometrical parameters under different function (LC-BLYP, CAM-B3LYP and  $\omega$ B97XD) for vanadium and titanium complexes.

|                   | LC-BLYP                |                        | CAM-B3LYP            |                      | $\omega$ B97XD       |                      |
|-------------------|------------------------|------------------------|----------------------|----------------------|----------------------|----------------------|
|                   | $\varphi(\text{BL})^a$ | $\varphi(\text{BA})^b$ | $\varphi(\text{BL})$ | $\varphi(\text{BA})$ | $\varphi(\text{BL})$ | $\varphi(\text{BA})$ |
| Complex <b>3</b>  | 0.06                   | 1.5                    | 0.04                 | 1.7                  | 0.04                 | 1.3                  |
| Complex <b>4</b>  | 0.04                   | 1.3                    | 0.02                 | 0.5                  | 0.03                 | 0.8                  |
| Complex <b>5</b>  | 0.04                   | 0.9                    | 0.03                 | 1.1                  | 0.04                 | 0.9                  |
| Complex <b>6</b>  | 0.05                   | 1.1                    | 0.04                 | 1.4                  | 0.04                 | 1.2                  |
| Complex <b>7</b>  | 0.05                   | 1.2                    | 0.04                 | 1.3                  | 0.04                 | 1.1                  |
| Complex <b>9</b>  | 0.05                   | 1.4                    | 0.05                 | 1.5                  | 0.05                 | 1.1                  |
| Complex <b>10</b> | 0.04                   | 1.9                    | 0.01                 | 1.8                  | 0.01                 | 1.4                  |
| Complex <b>11</b> | 0.03                   | 1.9                    | 0.01                 | 1.8                  | 0.01                 | 1.4                  |

<sup>a</sup> Root-mean-square error of bond length between calculated and experimental data

<sup>b</sup> Root-mean-square error of bond angle between calculated and experimental data.

$$\varphi = \sqrt{\frac{\sum_i^n (X_{ci} - X_{ei})^2}{n}}$$

, where  $X_{ci}$  is the calculated value for each bond length or bond angle and  $X_{ei}$  is the experimental value for each bond length or bond angle. The subscripts c and e represent calculated and experimental, respectively, and  $i$  is the serial number of each bond length or bond angle.

**Table S2.** The root-mean-square error ( $\varphi$ ) between experimental and calculated geometrical parameters, as well as some selected bond length and bond angle of the complexes **5** and **6**.

| Bond length [ $\text{\AA}$ ] |              |         |           |                |
|------------------------------|--------------|---------|-----------|----------------|
| Complex <b>5</b>             | Experimental | LC-BLYP | CAM-B3LYP | $\omega$ B97XD |
| V-N1                         | 1.652        | 1.579   | 1.604     | 1.599          |
| V-N2                         | 2.224        | 2.246   | 2.273     | 2.280          |
| V-N3                         | 1.858        | 1.830   | 1.852     | 1.849          |
| V-C11                        | 2.268        | 2.235   | 2.254     | 2.254          |
| V-C12                        | 2.271        | 2.239   | 2.257     | 2.258          |
| $\varphi(\text{BL})$         |              | 0.042   | 0.032     | 0.035          |
| Bond angle [ $^\circ$ ]      |              |         |           |                |
| Complex <b>5</b>             | Experimental | LC-BLYP | CAM-B3LYP | $\omega$ B97XD |
| V-N1-C1                      | 170.94       | 176.22  | 171.21    | 172.76         |
| N1-V-N2                      | 174.90       | 178.68  | 176.69    | 175.07         |
| N2-V-N3                      | 78.20        | 77.14   | 77.52     | 77.12          |
| N1-V-N3                      | 97.41        | 101.55  | 99.29     | 98.03          |
| C11-V-C12                    | 119.95       | 116.23  | 118.75    | 119.34         |
| C11-V-N3                     | 116.92       | 118.13  | 117.20    | 117.12         |
| C12-V-N3                     | 118.18       | 118.19  | 117.56    | 117.35         |
| $\varphi(\text{BA})$         |              | 0.94    | 1.14      | 0.93           |
| Bond length [ $\text{\AA}$ ] |              |         |           |                |
| Complex <b>6</b>             | Experimental | LC-BLYP | CAM-B3LYP | $\omega$ B97XD |
| V-N1                         | 1.654        | 1.596   | 1.619     | 1.614          |
| V-N2                         | 2.221        | 2.262   | 2.282     | 2.289          |
| V-N3                         | 1.886        | 1.872   | 1.891     | 1.887          |
| V-C25                        | 2.092        | 2.041   | 2.064     | 2.063          |
| V-C26                        | 2.091        | 2.039   | 2.063     | 2.060          |
| $\varphi(\text{BL})$         |              | 0.046   | 0.036     | 0.040          |
| Bond angle [ $^\circ$ ]      |              |         |           |                |
| Complex <b>6</b>             | Experimental | LC-BLYP | CAM-B3LYP | $\omega$ B97XD |
| V-N1-C1                      | 176.36       | 176.22  | 175.54    | 177.64         |
| N1-V-N2                      | 177.73       | 178.68  | 179.28    | 177.43         |
| N2-V-N3                      | 78.08        | 77.14   | 77.17     | 76.62          |
| N1-V-N3                      | 99.65        | 101.55  | 102.12    | 100.82         |
| C25-V-C26                    | 116.81       | 116.23  | 116.04    | 116.68         |

|                      |        |        |        |        |
|----------------------|--------|--------|--------|--------|
| C25-V-N3             | 118.11 | 118.13 | 118.26 | 117.96 |
| C26-V-N3             | 120.02 | 118.19 | 118.21 | 117.91 |
| $\varphi(\text{BA})$ |        | 1.14   | 1.40   | 1.18   |

**Table S3.** The pre-edge peak energies and intensity of the vanadium complexes **1-9**.

| Complex  | Experimental <sup>a</sup> |                     | Calculated          |                     | Expt. Intensity |                | Cal. Intensity |                |
|----------|---------------------------|---------------------|---------------------|---------------------|-----------------|----------------|----------------|----------------|
|          | E <sub>P1</sub> /eV       | E <sub>P2</sub> /eV | E <sub>P1</sub> /eV | E <sub>P2</sub> /eV | P <sub>1</sub>  | P <sub>2</sub> | P <sub>1</sub> | P <sub>2</sub> |
| <b>1</b> | 5465.0                    | 5466.8              | 5465.0              | 5467.1              | 0.20            | 0.38           | 3.04           | 7.23           |
| <b>2</b> | 5465.6                    | 5467.1              | 5465.0              | 5467.2              | 0.22            | 0.40           | 2.89           | 7.31           |
| <b>3</b> | 5466.4                    |                     | 5467.0              |                     | 0.50            |                | 7.67           |                |
| <b>4</b> | 5465.1                    | 5466.6              | 5465.1              | 5467.3              | 0.18            | 0.52           | 4.31           | 7.73           |
| <b>5</b> | 5465.2                    | 5467.3              | 5464.9              | 5467.6              | 0.21            | 0.28           | 2.89           | 4.83           |
| <b>6</b> | 5465.0                    | 5467.1              | 5464.4              | 5467.5              | 0.15            | 0.51           | 4.29           | 5.81           |
| <b>7</b> | 5465.5                    | 5467.5              | 5465.5              | 5467.8              | 0.21            | 0.38           | 3.41           | 4.97           |
| <b>8</b> | 5466.4                    |                     | 5465.5              |                     | 0.34            |                | 6.34           |                |
| <b>9</b> | 5467.1                    |                     | 5467.2              |                     | 0.27            |                | 4.85           |                |

<sup>a</sup> Experimental energies as reported in Ref.18. E<sub>P1</sub> is the energy of the first peak and E<sub>P2</sub> is the energy of the second peak.

**Table S4.** The pre-edge peak energies and intensity of the titanium complexes **10-12**.

| Complex   | Experimental <sup>a</sup> |                     | Calculated          |                     | Expt. Intensity |                | Cal. Intensity |                |
|-----------|---------------------------|---------------------|---------------------|---------------------|-----------------|----------------|----------------|----------------|
|           | E <sub>P1</sub> /eV       | E <sub>P2</sub> /eV | E <sub>P1</sub> /eV | E <sub>P2</sub> /eV | P <sub>1</sub>  | P <sub>2</sub> | P <sub>1</sub> | P <sub>2</sub> |
| <b>10</b> | 4966.1                    |                     | 4966.1              |                     | 0.16            |                | 1.83           |                |
| <b>11</b> | 4966.1                    | 4967.5              | 4966.5              | 4967.9              | 0.15            | 0.13           | 1.63           | 1.30           |
| <b>12</b> | 4966.1                    | 4967.8              | 4966.2              | 4967.9              | 0.17            | 0.33           | 2.31           | 4.74           |

<sup>a</sup> Experimental energies as reported in Ref. 19. E<sub>P1</sub> is the energy of the first peak and E<sub>P2</sub> is the energy of the second peak.

**Table S5.** The absorption intensity and p-hybridization ratio for each excited state of complexes **1a–1d** and **10a–10d**.

| Complexes  | Excited States                            |        |        |        |        |
|------------|-------------------------------------------|--------|--------|--------|--------|
|            | 1                                         | 2      | 3      | 4      | 5      |
|            | p-hybridization ratio ( $R_h$ )           |        |        |        |        |
| <b>1a</b>  | 0.0159                                    | 0.0125 | 0.0180 | 0.0062 | 0.0520 |
| <b>1d</b>  | 0.0124                                    | 0.0204 | 0.0201 | 0.0316 | 0.0753 |
| <b>1c</b>  | 0.0182                                    | 0.0192 | 0.0576 | 0.0525 | 0.0321 |
| <b>1d</b>  | 0.0292                                    | 0.0175 | 0.1080 | 0.0281 | 0.1465 |
| <b>10a</b> | 0.0096                                    | 0.0102 | 0.0087 | 0.0040 | 0.0041 |
| <b>10b</b> | 0.0091                                    | 0.0164 | 0.0179 | 0.0057 | 0.0199 |
| <b>10c</b> | 0.0106                                    | 0.0333 | 0.0240 | 0.0163 | 0.2001 |
| <b>10d</b> | 0.0203                                    | 0.0192 | 0.0321 | 0.2215 | 0.0782 |
|            | Absorption Intensity ( $\times 10^{-4}$ ) |        |        |        |        |
| <b>1a</b>  | 0.8963                                    | 1.0093 | 1.1336 | 0.0186 | 4.1822 |
| <b>1d</b>  | 0.6227                                    | 1.9935 | 2.2842 | 1.2450 | 3.4434 |
| <b>1c</b>  | 0.9011                                    | 1.9889 | 2.5713 | 4.3757 | 2.0087 |
| <b>1d</b>  | 1.8221                                    | 1.7578 | 7.1063 | 1.6773 | 1.4297 |
| <b>10a</b> | 0.4930                                    | 0.5100 | 0.3172 | 0.1654 | 0.1436 |
| <b>10b</b> | 0.3801                                    | 0.3773 | 0.9157 | 0.1451 | 1.5823 |
| <b>10c</b> | 0.3190                                    | 0.9289 | 0.8185 | 0.6840 | 2.4621 |
| <b>10d</b> | 0.7523                                    | 0.7912 | 0.7067 | 2.3074 | 1.6867 |

**Table S6.** The vanadium p hybridization ratio in the molecular orbital which related to the electron transition in each excited states for complexes **5**, **6** and **7**.

| Pre-edge         | Vanadium p hybridization ratio |                |
|------------------|--------------------------------|----------------|
|                  | P <sub>1</sub>                 | P <sub>2</sub> |
| Complex <b>5</b> | 0.0444                         | 0.0518         |
| Complex <b>6</b> | 0.0786                         | 0.2633         |
| Complex <b>7</b> | 0.0410                         | 0.2153         |

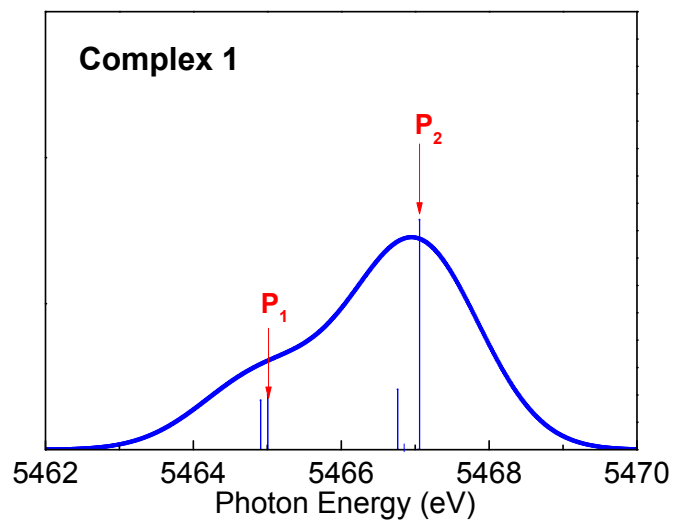

**Fig. S1.** Definitions of two peaks in the pre-edge region of XANES spectra of complex **1** as an example. Excited state energies which exhibited relatively larger oscillator strengths were identified as  $P_1$  and  $P_2$  to compare with experimental peak values.

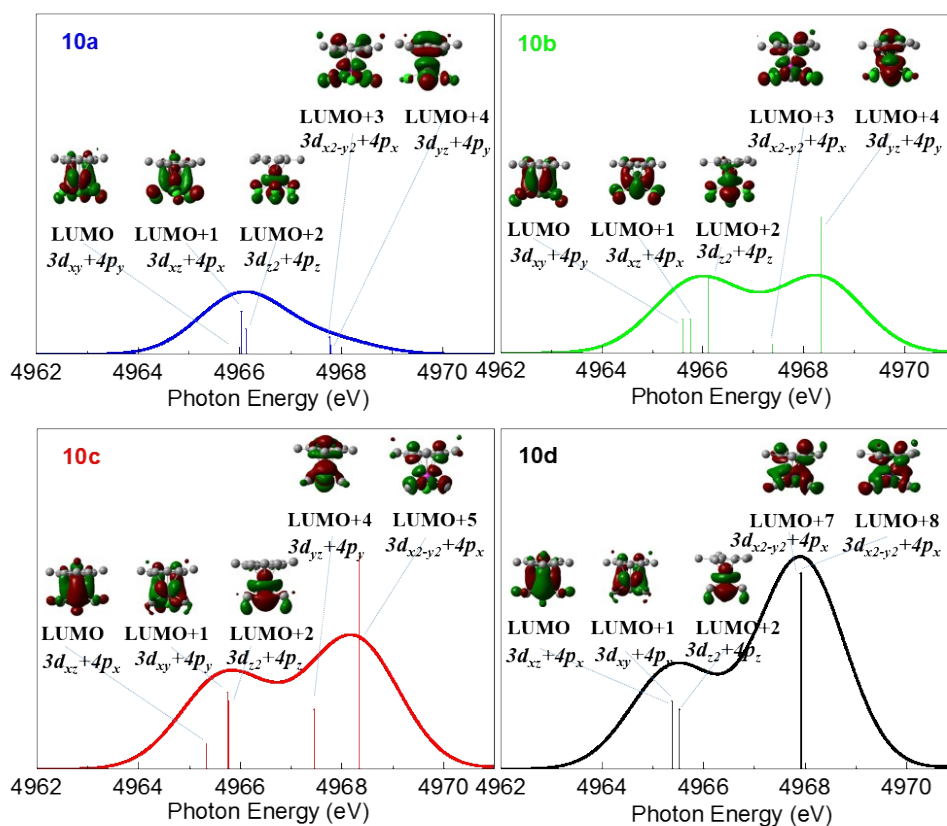

**Fig. S2.** The pre-edge region of titanium complexes **10a–10d**, as well as some related molecular orbitals.



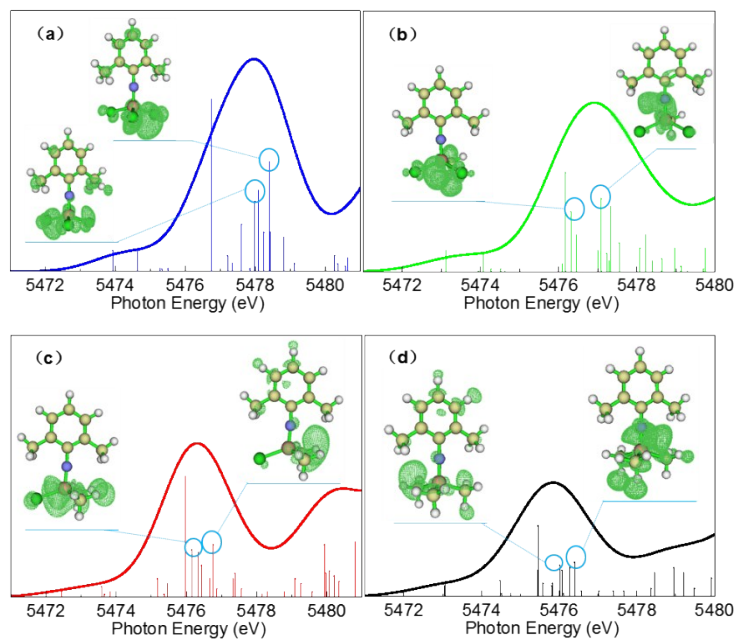

**Fig. S3.** The electron density difference map ( $\Delta\rho_{ex}$ ) of the second and third strongest excited states in the shoulder peak region for vanadium **1a–1d**.

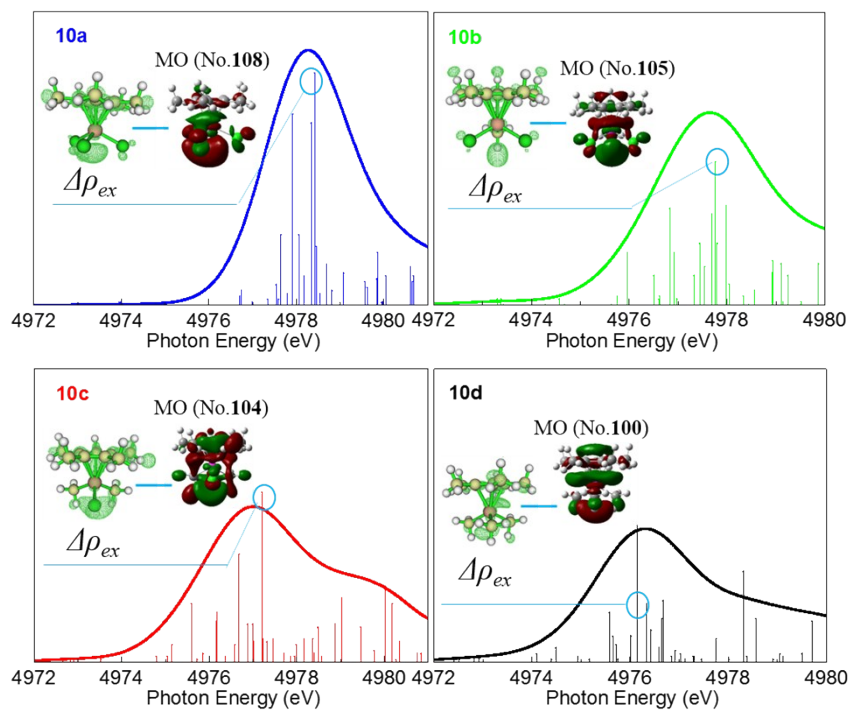

**Fig. S4.** The electron density difference map ( $\Delta\rho_{ex}$ ) of the strong excited states in the shoulder peak region for titanium complexes **10a–10d**, and the related molecular orbitals.

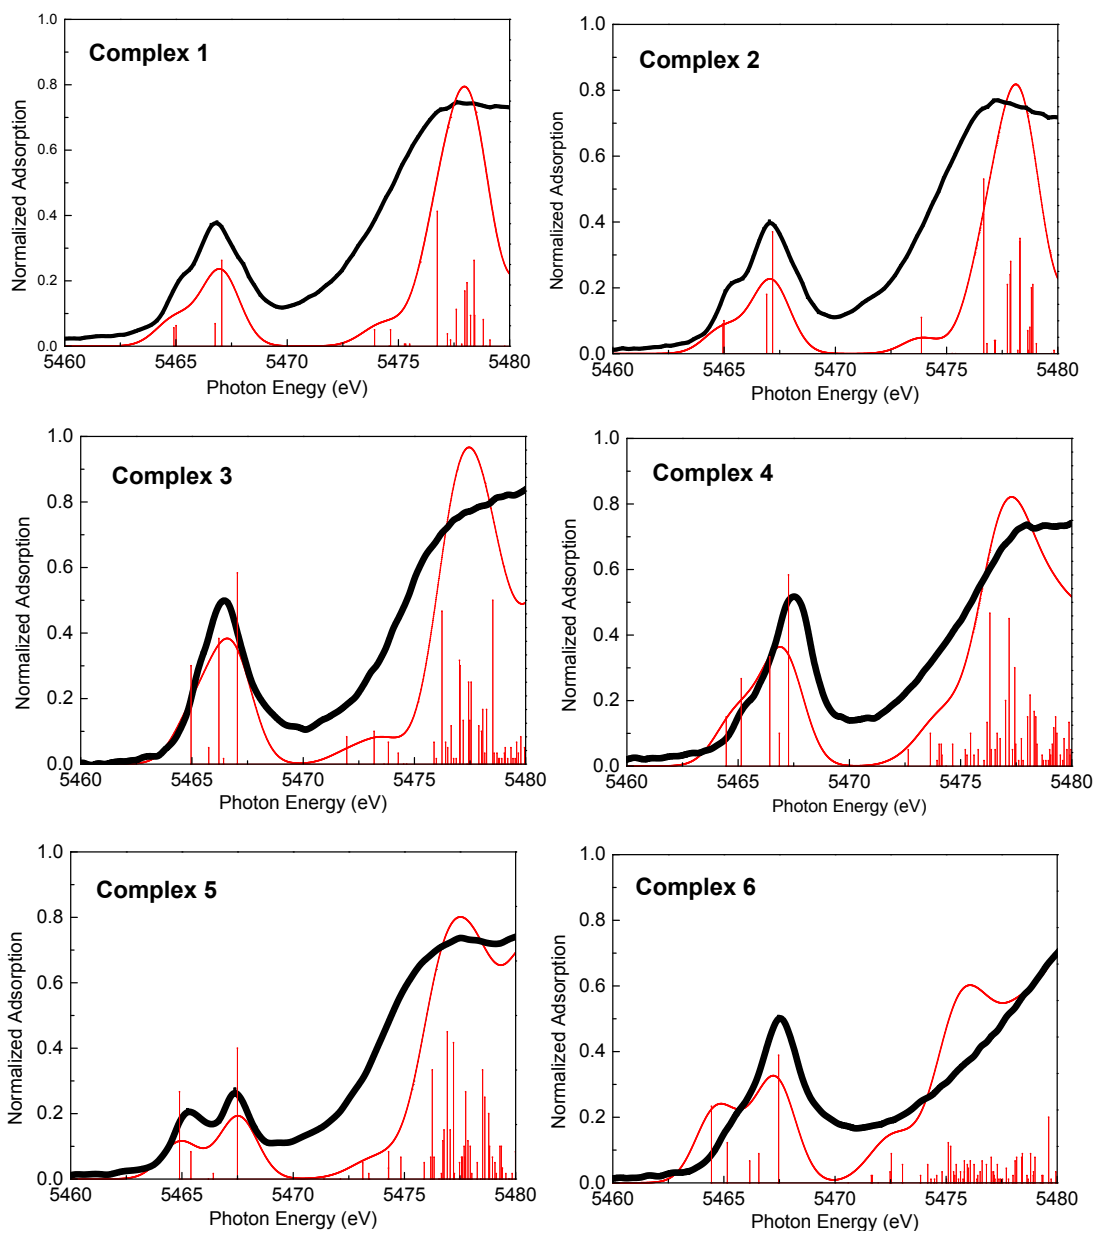

**Fig. S5(A).** The experimental (black line) and calculated (red line) vanadium XANES spectrum for complexes 1-6.

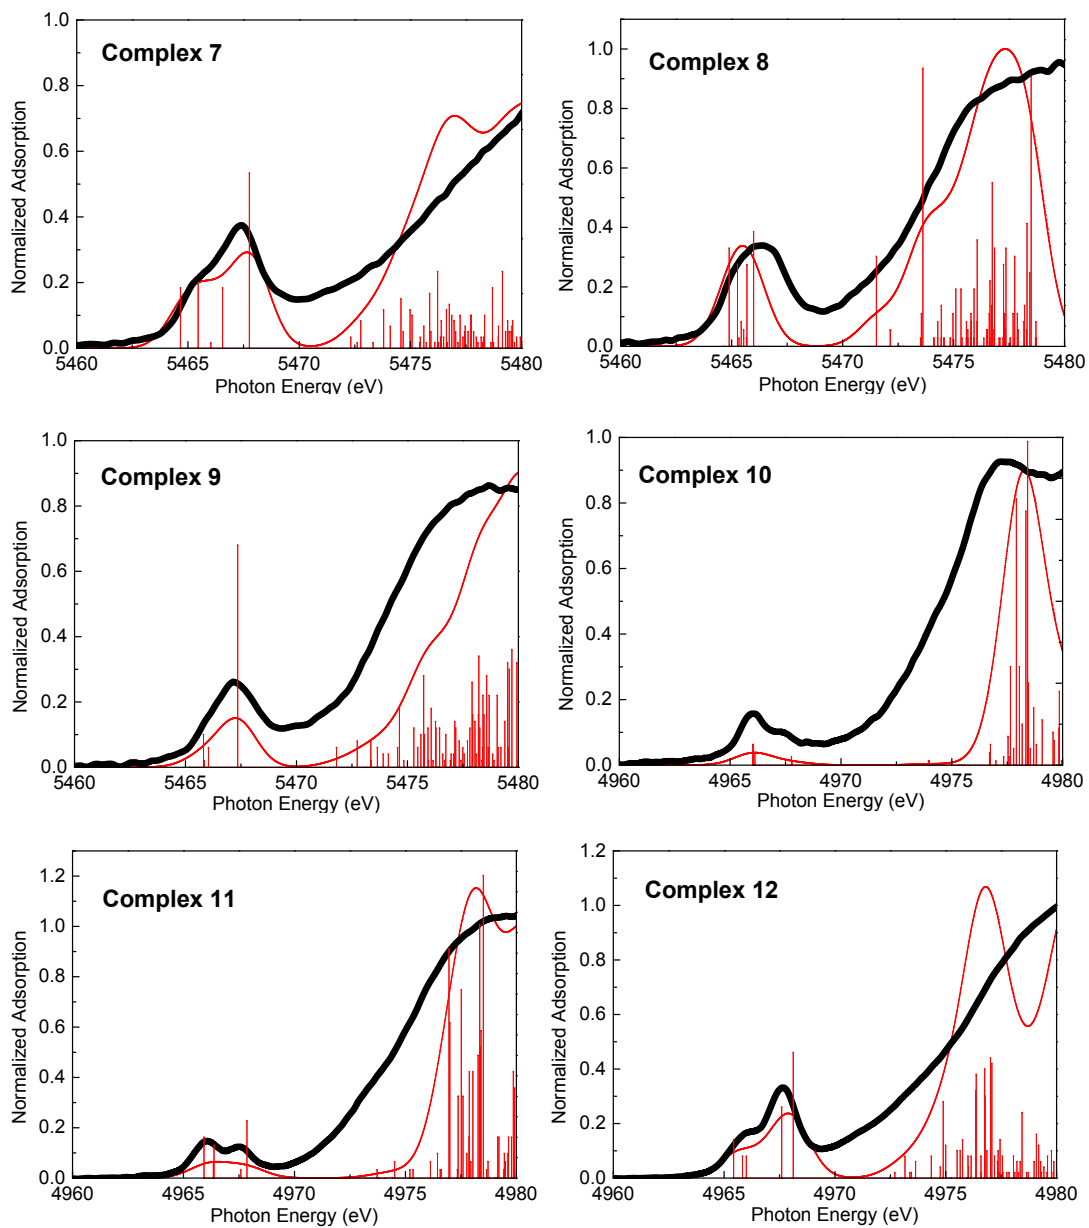

**Fig. S5(B).** The experimental (black line) and calculated (red line) vanadium XANES spectrum for complexes 7-12.

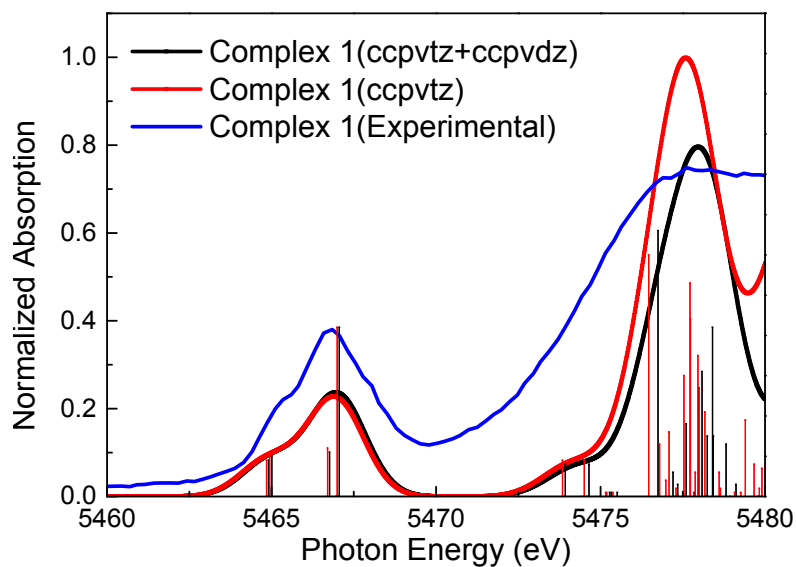

**Fig. S6.** Basis set dependency in ligand atoms for the K-edge spectra of complex **1**. Calculated spectra with larger basis sets (cc-pVTZ) agreed very well with that with smaller basis sets (cc-pVDZ), particularly for the pre-edge region. The same basis set (cc-pVTZ) was employed for V atom.

Optimized geometries of complexes 1-12:

Complex 1

|    |          |          |          |
|----|----------|----------|----------|
| V  | 1.48519  | 0.01638  | -0.00002 |
| Cl | 2.22634  | 2.0486   | -0.00379 |
| Cl | 2.03651  | -1.07017 | -1.79023 |
| N  | -0.11001 | 0.07771  | 0.0008   |
| C  | -1.48988 | 0.03953  | 0.00049  |
| C  | -2.20113 | 1.25823  | -0.00015 |
| C  | -3.59344 | 1.18842  | -0.00113 |
| C  | -4.24716 | -0.04162 | -0.00095 |
| C  | -3.52138 | -1.23148 | -0.00002 |
| C  | -2.128   | -1.22025 | 0.00057  |
| C  | -1.46857 | 2.56921  | 0.00238  |
| C  | -1.32304 | -2.48944 | 0.00107  |
| H  | -4.1711  | 2.1147   | -0.00195 |
| H  | -5.33801 | -0.07445 | -0.00162 |
| H  | -4.0445  | -2.18948 | 0.00005  |
| H  | -2.17282 | 3.41086  | -0.01702 |
| H  | -0.83454 | 2.6663   | 0.89708  |
| H  | -0.79975 | 2.65246  | -0.86775 |
| H  | -0.67121 | -2.54436 | -0.88397 |
| H  | -0.67017 | -2.54313 | 0.88542  |
| H  | -1.98067 | -3.3683  | 0.00204  |
| Cl | 2.03886  | -1.06554 | 1.79219  |

Complex 2

|   |          |          |          |
|---|----------|----------|----------|
| V | -2.0816  | 0.0035   | 0.01065  |
| N | -0.48948 | 0.01957  | 0.10238  |
| C | 0.94692  | 0.00824  | 0.07056  |
| C | 1.40578  | -0.21407 | -1.38592 |
| C | 1.47342  | 1.36316  | 0.58769  |
| C | 1.47009  | -1.14916 | 0.94418  |
| C | 2.94244  | -0.20407 | -1.43544 |
| C | 3.45834  | 1.14715  | -0.92218 |
| C | 3.00907  | 1.34772  | 0.53398  |
| C | 3.52318  | 0.20488  | 1.42424  |
| C | 3.00631  | -1.14103 | 0.89403  |
| C | 3.48957  | -1.33485 | -0.55143 |
| H | 1.0135   | -1.17984 | -1.7423  |
| H | 0.98118  | 0.57029  | -2.03174 |
| H | 1.06247  | 2.17141  | -0.03713 |

|    |          |          |          |
|----|----------|----------|----------|
| H  | 1.11923  | 1.52547  | 1.61774  |
| H  | 1.11161  | -1.02774 | 1.97808  |
| H  | 1.07005  | -2.09873 | 0.55563  |
| H  | 3.2545   | -0.36416 | -2.47868 |
| H  | 3.05222  | 1.9597   | -1.54752 |
| H  | 4.55624  | 1.199    | -1.00002 |
| H  | 3.39709  | 2.30643  | 0.91089  |
| H  | 3.16274  | 0.35934  | 2.45518  |
| H  | 4.62418  | 0.2073   | 1.46595  |
| H  | 3.39243  | -1.95778 | 1.52279  |
| H  | 3.17518  | -2.31653 | -0.94167 |
| H  | 4.59186  | -1.31692 | -0.56921 |
| Cl | -2.76809 | 1.85976  | 0.89626  |
| Cl | -2.53591 | -0.12107 | -2.10347 |
| Cl | -2.73199 | -1.76354 | 1.08498  |

### Complex 3

|    |          |          |          |
|----|----------|----------|----------|
| V  | -0.16943 | 1.51747  | 0.39479  |
| Cl | -0.0615  | 2.28131  | 2.46496  |
| Cl | -0.16484 | 3.11936  | -1.12255 |
| N  | -1.45224 | 0.56088  | 0.22179  |
| N  | 1.11933  | 0.35761  | 0.08645  |
| C  | -2.44796 | -0.37593 | 0.04277  |
| C  | -2.66921 | -1.33361 | 1.05577  |
| C  | -3.65922 | -2.29099 | 0.83946  |
| C  | -4.40598 | -2.2944  | -0.33743 |
| C  | -4.17588 | -1.33514 | -1.32138 |
| C  | -3.19541 | -0.35745 | -1.15394 |
| C  | -1.84954 | -1.30684 | 2.31513  |
| C  | -2.92937 | 0.69148  | -2.19637 |
| C  | 2.02607  | -0.47434 | -0.20604 |
| C  | 2.721    | -1.21691 | 0.96402  |
| C  | 4.25216  | -1.24123 | 0.82193  |
| C  | 2.16234  | -2.65378 | 1.03758  |
| C  | 2.39071  | -0.5141  | 2.29009  |
| C  | 2.36256  | -0.65973 | -1.71007 |
| C  | 3.54231  | 0.27533  | -2.04697 |
| C  | 2.70973  | -2.1076  | -2.09354 |
| C  | 1.15243  | -0.2396  | -2.56196 |
| H  | -3.84906 | -3.0434  | 1.6078   |
| H  | -5.17845 | -3.05088 | -0.48722 |
| H  | -4.76802 | -1.34153 | -2.23898 |

|   |          |          |          |
|---|----------|----------|----------|
| H | -2.17914 | -2.08454 | 3.0167   |
| H | -0.78298 | -1.46914 | 2.09387  |
| H | -1.91787 | -0.32853 | 2.81361  |
| H | -3.0354  | 1.70281  | -1.77585 |
| H | -1.89822 | 0.62271  | -2.57633 |
| H | -3.62104 | 0.5883   | -3.04285 |
| H | 4.60106  | -1.76622 | -0.07588 |
| H | 4.67989  | -1.76152 | 1.69264  |
| H | 4.66549  | -0.22149 | 0.8099   |
| H | 2.5054   | -3.12268 | 1.97275  |
| H | 2.49532  | -3.28735 | 0.20693  |
| H | 1.06134  | -2.64739 | 1.04869  |
| H | 1.31547  | -0.53047 | 2.51079  |
| H | 2.91628  | -1.02685 | 3.11     |
| H | 2.70681  | 0.53893  | 2.28168  |
| H | 3.73093  | 0.24153  | -3.13139 |
| H | 4.46998  | -0.01483 | -1.53643 |
| H | 3.30441  | 1.3152   | -1.77681 |
| H | 3.58937  | -2.50312 | -1.57111 |
| H | 2.93146  | -2.13879 | -3.1713  |
| H | 1.86213  | -2.78505 | -1.91266 |
| H | 0.92562  | 0.82863  | -2.45588 |
| H | 0.25267  | -0.81017 | -2.28377 |
| H | 1.37126  | -0.43768 | -3.6221  |

#### Complex 4

|    |          |          |          |
|----|----------|----------|----------|
| V  | -3.81459 | 1.14844  | 0.7962   |
| Cl | -4.35226 | 1.01859  | 2.88293  |
| Cl | -4.98235 | 2.49924  | -0.42177 |
| N  | -3.93518 | -0.27858 | 0.09427  |
| C  | -3.96067 | -1.44259 | -0.64159 |
| C  | -4.45058 | -2.61274 | -0.02637 |
| C  | -4.35238 | -3.80123 | -0.74592 |
| C  | -3.76812 | -3.82216 | -2.01162 |
| C  | -3.29438 | -2.65025 | -2.59972 |
| C  | -3.38818 | -1.42953 | -1.93375 |
| C  | -4.98291 | -2.56144 | 1.37554  |
| C  | -2.83451 | -0.16531 | -2.52896 |
| H  | -4.71655 | -4.72697 | -0.29678 |
| H  | -3.67051 | -4.76759 | -2.54736 |
| H  | -2.82388 | -2.68583 | -3.58318 |
| H  | -5.37161 | -3.54002 | 1.68511  |

|   |          |          |          |
|---|----------|----------|----------|
| H | -4.1826  | -2.26884 | 2.07472  |
| H | -5.78763 | -1.81772 | 1.47534  |
| H | -3.57064 | 0.65079  | -2.49381 |
| H | -1.94144 | 0.17181  | -1.97823 |
| H | -2.5305  | -0.32699 | -3.56963 |
| C | 0.37603  | 0.7949   | 0.05398  |
| C | 0.10819  | 2.07574  | -0.3541  |
| H | 0.75581  | 2.80395  | -0.8273  |
| C | -1.78698 | 1.32101  | 0.54864  |
| C | -1.79091 | 3.66948  | -0.21037 |
| C | -1.90784 | 4.19264  | -1.49486 |
| C | -2.26112 | 4.36029  | 0.90407  |
| C | -2.52467 | 5.42912  | -1.6634  |
| H | -1.5366  | 3.62471  | -2.34918 |
| C | -2.88706 | 5.5913   | 0.72162  |
| H | -2.12727 | 3.93676  | 1.90141  |
| C | -3.01973 | 6.12392  | -0.5591  |
| H | -2.62921 | 5.84788  | -2.66503 |
| H | -3.26499 | 6.13692  | 1.58677  |
| H | -3.50839 | 7.08906  | -0.69912 |
| C | -1.04896 | -0.88764 | 1.29374  |
| C | -1.10572 | -0.88091 | 2.6871   |
| C | -1.21538 | -2.06779 | 0.58062  |
| C | -1.2959  | -2.08025 | 3.36686  |
| H | -0.97371 | 0.05341  | 3.22892  |
| C | -1.38376 | -3.26695 | 1.26696  |
| H | -1.22113 | -2.04715 | -0.50561 |
| C | -1.42108 | -3.27553 | 2.65898  |
| H | -1.33215 | -2.07877 | 4.45686  |
| H | -1.48435 | -4.19458 | 0.7029   |
| H | -1.54917 | -4.21733 | 3.19467  |
| N | -0.83087 | 0.35719  | 0.59847  |
| N | -1.18477 | 2.3891   | -0.02183 |
| B | 1.77207  | -0.05283 | -0.13881 |
| C | 1.32687  | -1.35131 | -1.06635 |
| C | 1.35319  | -2.69539 | -0.70023 |
| C | 0.69832  | -1.10811 | -2.29024 |
| C | 0.78843  | -3.71438 | -1.46672 |
| C | 0.11872  | -2.08856 | -3.08114 |
| C | 0.1538   | -3.41155 | -2.65965 |
| C | 2.48275  | -0.43575 | 1.2919   |
| C | 3.63219  | -1.22707 | 1.29494  |



|   |          |          |          |
|---|----------|----------|----------|
| C | 2.13659  | 0.0816   | 2.5348   |
| C | 4.34417  | -1.55262 | 2.44025  |
| C | 2.81154  | -0.22326 | 3.71286  |
| C | 3.92141  | -1.05239 | 3.66683  |
| C | 2.88244  | 0.925    | -0.88861 |
| C | 3.2723   | 2.12114  | -0.2793  |
| C | 3.59551  | 0.62003  | -2.049   |
| C | 4.24669  | 2.97567  | -0.77973 |
| C | 4.58163  | 1.44503  | -2.58508 |
| C | 4.90891  | 2.63401  | -1.95049 |
| F | 3.37914  | -0.51774 | -2.72298 |
| F | 5.21809  | 1.09669  | -3.70409 |
| F | 5.84684  | 3.43341  | -2.45378 |
| F | 4.55021  | 4.1106   | -0.14674 |
| F | -0.49378 | -1.77445 | -4.23071 |
| F | 0.59712  | 0.15259  | -2.75424 |
| F | -0.43448 | -4.36395 | -3.38449 |
| F | 0.78698  | -4.97238 | -1.01807 |
| F | 2.68991  | 2.51313  | 0.87041  |
| F | 1.82958  | -3.09113 | 0.48629  |
| F | 4.09899  | -1.71464 | 0.13558  |
| F | 5.42381  | -2.33298 | 2.37857  |
| F | 4.58375  | -1.35561 | 4.78193  |
| F | 2.40547  | 0.28776  | 4.87873  |
| F | 1.11091  | 0.95006  | 2.66733  |

#### Complex 5

|   |          |          |          |
|---|----------|----------|----------|
| V | 1.01089  | -0.78011 | -0.04645 |
| N | -0.58456 | -0.68304 | -0.05695 |
| N | 1.37943  | 1.03141  | 0.00968  |
| C | -2.00986 | -0.77211 | -0.02649 |
| C | -2.40089 | -2.25956 | -0.16285 |
| C | -2.5426  | -0.22208 | 1.31202  |
| C | -2.61933 | 0.03117  | -1.19252 |
| C | -3.93058 | -2.38754 | -0.12879 |
| C | -4.46054 | -1.8385  | 1.20481  |
| C | -4.07243 | -0.35846 | 1.34147  |
| C | -4.67731 | 0.44351  | 0.17828  |
| C | -4.14894 | -0.10687 | -1.15579 |
| C | -4.53759 | -1.58703 | -1.29154 |
| C | 4.14111  | -1.76106 | -0.00085 |
| C | 5.51478  | -1.58737 | 0.04302  |

|   |          |          |          |
|---|----------|----------|----------|
| C | 6.02068  | -0.28702 | 0.0977   |
| C | 5.13713  | 0.78311  | 0.10459  |
| C | 3.76717  | 0.51729  | 0.05718  |
| C | 2.72265  | 1.59105  | 0.05929  |
| C | 0.37796  | 2.05373  | 0.01029  |
| C | -0.13859 | 2.50828  | 1.23585  |
| C | -1.12152 | 3.50165  | 1.21379  |
| C | -1.57615 | 4.0326   | 0.00993  |
| C | -1.05343 | 3.56876  | -1.19374 |
| C | -0.07395 | 2.57209  | -1.21538 |
| C | 0.31859  | 1.90076  | 2.53529  |
| C | 0.43736  | 2.0199   | -2.5189  |
| H | -1.99074 | -2.65345 | -1.1061  |
| H | -1.93789 | -2.82627 | 0.66024  |
| H | -2.0806  | -0.78053 | 2.14161  |
| H | -2.24978 | 0.8342   | 1.41039  |
| H | -2.32475 | 1.08722  | -1.09811 |
| H | -2.21312 | -0.34941 | -2.14354 |
| H | -4.20166 | -3.45016 | -0.22812 |
| H | -4.04307 | -2.41763 | 2.04509  |
| H | -5.55707 | -1.94748 | 1.24956  |
| H | -4.44766 | 0.03746  | 2.2984   |
| H | -4.41434 | 1.50998  | 0.2779   |
| H | -5.77765 | 0.37466  | 0.20542  |
| H | -4.57904 | 0.46828  | -1.99068 |
| H | -4.1765  | -1.98649 | -2.25394 |
| H | -5.63545 | -1.69141 | -1.28908 |
| H | 3.68356  | -2.75057 | -0.044   |
| H | 6.17557  | -2.45368 | 0.0354   |
| H | 7.09732  | -0.11335 | 0.1354   |
| H | 5.49348  | 1.81317  | 0.14689  |
| H | 2.84351  | 2.21638  | 0.96341  |
| H | 2.8898   | 2.26602  | -0.80077 |
| H | -1.53815 | 3.85878  | 2.15847  |
| H | -2.34338 | 4.80872  | 0.00995  |
| H | -1.41856 | 3.97638  | -2.13927 |
| H | 1.40411  | 2.00873  | 2.68307  |
| H | -0.18528 | 2.37578  | 3.38787  |
| H | 0.10803  | 0.82054  | 2.5626   |
| H | 1.53333  | 2.08322  | -2.59731 |
| H | 0.18223  | 0.95355  | -2.62013 |
| H | 0.00525  | 2.56264  | -3.37027 |

|    |         |          |          |
|----|---------|----------|----------|
| N  | 3.28982 | -0.72636 | 0.00697  |
| Cl | 1.23946 | -1.94535 | 1.87443  |
| Cl | 1.31424 | -1.83022 | -2.01794 |

Complex 6

|   |          |          |          |
|---|----------|----------|----------|
| V | 1.09047  | -0.96679 | 0.01509  |
| N | -0.5229  | -0.92308 | 0.02518  |
| N | 1.49623  | 0.8757   | 0.03531  |
| C | -1.95155 | -0.9202  | 0.00609  |
| C | -2.47217 | -2.36688 | -0.14246 |
| C | -2.50053 | -0.3214  | 1.31894  |
| C | -2.45712 | -0.07689 | -1.18399 |
| C | -4.01103 | -2.36903 | -0.171   |
| C | -4.54905 | -1.76715 | 1.13971  |
| C | -4.03843 | -0.3232  | 1.29086  |
| C | -4.52401 | 0.52371  | 0.10029  |
| C | -3.99393 | -0.08002 | -1.21275 |
| C | -4.50309 | -1.52451 | -1.36045 |
| C | 4.22244  | -1.97118 | -0.04678 |
| C | 5.59987  | -1.81471 | -0.05096 |
| C | 6.11975  | -0.51795 | -0.00917 |
| C | 5.24308  | 0.55764  | 0.0337   |
| C | 3.86711  | 0.3089   | 0.03379  |
| C | 2.8445   | 1.40661  | 0.07854  |
| C | 0.51494  | 1.90967  | 0.02444  |
| C | -0.02828 | 2.36666  | 1.23832  |
| C | -1.00499 | 3.36642  | 1.20595  |
| C | -1.43331 | 3.90939  | -0.00388 |
| C | -0.88892 | 3.44646  | -1.19989 |
| C | 0.08366  | 2.44229  | -1.20369 |
| C | 0.39496  | 1.73986  | 2.54341  |
| C | 0.6063   | 1.87896  | -2.50159 |
| H | -2.06432 | -2.80146 | -1.06615 |
| H | -2.09683 | -2.97087 | 0.69597  |
| H | -2.12429 | -0.9104  | 2.16792  |
| H | -2.12077 | 0.70268  | 1.43094  |
| H | -2.07803 | 0.94777  | -1.08288 |
| H | -2.04703 | -0.4919  | -2.11615 |
| H | -4.36951 | -3.40201 | -0.27834 |
| H | -4.22074 | -2.37448 | 1.9961   |
| H | -5.64894 | -1.78069 | 1.13623  |
| H | -4.41776 | 0.10703  | 2.22798  |

|   |          |          |          |
|---|----------|----------|----------|
| H | -4.16534 | 1.55811  | 0.20659  |
| H | -5.62343 | 0.5573   | 0.08435  |
| H | -4.34038 | 0.5239   | -2.0626  |
| H | -4.13954 | -1.95695 | -2.30429 |
| H | -5.60229 | -1.53684 | -1.40122 |
| H | 3.76041  | -2.95547 | -0.0792  |
| H | 6.24876  | -2.68501 | -0.08558 |
| H | 7.19482  | -0.35301 | -0.0112  |
| H | 5.60754  | 1.58192  | 0.0664   |
| H | 3.01149  | 2.00394  | 0.99326  |
| H | 3.03168  | 2.09742  | -0.76271 |
| H | -1.43874 | 3.71771  | 2.14138  |
| H | -2.19469 | 4.6864   | -0.01472 |
| H | -1.23619 | 3.85563  | -2.14777 |
| H | 1.47374  | 1.8439   | 2.71845  |
| H | -0.12878 | 2.2012   | 3.38858  |
| H | 0.17794  | 0.66381  | 2.54402  |
| H | 1.69296  | 2.00113  | -2.60107 |
| H | 0.4039   | 0.80167  | -2.56186 |
| H | 0.13454  | 2.37016  | -3.36036 |
| C | 1.38224  | -2.05008 | 1.7512   |
| H | 1.67374  | -3.05866 | 1.40442  |
| H | 2.21902  | -1.64859 | 2.34043  |
| H | 0.50321  | -2.15816 | 2.3946   |
| C | 1.33997  | -1.9848  | -1.76653 |
| H | 2.19933  | -1.6084  | -2.33898 |
| H | 1.57175  | -3.02035 | -1.45511 |
| H | 0.459    | -2.02262 | -2.41565 |
| N | 3.37504  | -0.93278 | -0.00496 |

#### Complex 7

|   |         |          |          |
|---|---------|----------|----------|
| V | 0.30447 | 0.73405  | -0.54961 |
| F | 3.42676 | -0.69324 | 2.29373  |
| F | 4.35243 | -0.24643 | 0.40114  |
| F | 4.43809 | -2.25402 | 1.18329  |
| F | 3.55993 | -1.75457 | -1.66866 |
| F | 2.89865 | -3.57141 | -0.69438 |
| F | 1.48171 | -2.31027 | -1.73265 |
| F | 2.07286 | -3.20617 | 2.0014   |
| F | 0.4223  | -2.937   | 0.64333  |
| F | 0.79388 | -1.47614 | 2.18586  |
| O | 1.77425 | -0.28072 | -0.00346 |

|   |          |          |          |
|---|----------|----------|----------|
| N | -1.01074 | -0.1875  | -0.42081 |
| N | 2.02943  | 2.2126   | -0.80775 |
| N | -0.34088 | 2.31494  | 0.23113  |
| C | -2.21354 | -0.96414 | -0.49687 |
| C | -1.98761 | -2.16333 | -1.44298 |
| C | -2.60062 | -1.47272 | 0.90694  |
| C | -3.37077 | -0.10593 | -1.04721 |
| C | -3.26757 | -3.00774 | -1.52229 |
| C | -3.63292 | -3.51596 | -0.11889 |
| C | -3.87721 | -2.32084 | 0.81564  |
| C | -5.0216  | -1.45785 | 0.26307  |
| C | -4.64911 | -0.95194 | -1.13895 |
| C | -4.4153  | -2.14879 | -2.07247 |
| C | 3.20025  | 1.99356  | -1.42034 |
| C | 4.19275  | 2.9581   | -1.48596 |
| C | 3.96032  | 4.19327  | -0.87743 |
| C | 2.75216  | 4.41278  | -0.23049 |
| C | 1.8036   | 3.38778  | -0.22046 |
| C | 0.47152  | 3.50118  | 0.45547  |
| C | -1.66306 | 2.50097  | 0.74026  |
| C | -1.98167 | 2.05819  | 2.03511  |
| C | -3.28456 | 2.24613  | 2.50505  |
| C | -4.24585 | 2.87522  | 1.71873  |
| C | -3.91312 | 3.31606  | 0.44112  |
| C | -2.62574 | 3.13021  | -0.06957 |
| C | -0.95294 | 1.34989  | 2.87452  |
| C | -2.29927 | 3.51387  | -1.4885  |
| C | 0.19129  | 0.87179  | -2.59773 |
| C | 2.30422  | -1.47125 | 0.34051  |
| C | 3.65934  | -1.17356 | 1.06586  |
| C | 2.5668   | -2.30355 | -0.95315 |
| C | 1.38803  | -2.28869 | 1.31024  |
| H | 0.63514  | 3.67179  | 1.53801  |
| H | -0.047   | 4.40645  | 0.08888  |
| H | 2.53749  | 5.36104  | 0.26398  |
| H | 3.33164  | 0.99946  | -1.84962 |
| H | -0.76561 | 0.5753   | -3.04485 |
| H | 0.96863  | 0.16289  | -2.93747 |
| H | 0.46527  | 1.88313  | -2.93396 |
| H | 4.72081  | 4.97529  | -0.90535 |
| H | 5.13201  | 2.74319  | -1.99446 |
| H | -1.99622 | 2.62621  | -2.06433 |

|   |          |          |          |
|---|----------|----------|----------|
| H | -1.46303 | 4.22706  | -1.55115 |
| H | -3.1688  | 3.97087  | -1.98018 |
| H | -5.25747 | 3.01945  | 2.10242  |
| H | -3.54427 | 1.89474  | 3.50648  |
| H | -1.32876 | 1.17296  | 3.89144  |
| H | -0.01586 | 1.92159  | 2.94991  |
| H | -0.69204 | 0.37927  | 2.42884  |
| H | -4.53639 | -4.14676 | -0.16934 |
| H | -2.81949 | -4.14611 | 0.27783  |
| H | -4.66977 | 3.79554  | -0.18434 |
| H | -1.14654 | -2.76545 | -1.07532 |
| H | -1.70837 | -1.78476 | -2.4395  |
| H | -3.09215 | 0.28904  | -2.0378  |
| H | -3.53367 | 0.75087  | -0.37967 |
| H | -5.46358 | -0.32423 | -1.53387 |
| H | -3.09024 | -3.86412 | -2.19191 |
| H | -1.77108 | -2.06031 | 1.32427  |
| H | -2.76459 | -0.60577 | 1.5659   |
| H | -5.33586 | -2.75104 | -2.15336 |
| H | -4.17003 | -1.79512 | -3.08808 |
| H | -4.13833 | -2.68469 | 1.82193  |
| H | -5.95364 | -2.04596 | 0.21817  |
| H | -5.20608 | -0.60233 | 0.93421  |

#### Complex 8

|    |          |          |          |
|----|----------|----------|----------|
| V  | -1.56099 | 0.00065  | 0.03636  |
| Cl | -2.62586 | 0.60387  | 2.02126  |
| Cl | -2.17683 | -0.46785 | -2.1564  |
| N  | 0.04825  | -0.10066 | 0.18857  |
| N  | -2.17448 | -2.03213 | 0.56709  |
| C  | -1.38883 | -3.1071  | -0.05584 |
| C  | -3.61976 | -2.2676  | 0.39978  |
| N  | -1.69126 | 2.09977  | -0.57458 |
| C  | -0.95442 | 3.04695  | 0.27487  |
| C  | -3.07193 | 2.56312  | -0.80249 |
| H  | -1.98067 | -2.02366 | 1.5704   |
| H  | -1.23074 | 2.05001  | -1.48561 |
| H  | -1.72246 | -4.09973 | 0.29293  |
| H  | -0.32912 | -2.96856 | 0.18492  |
| H  | -1.51021 | -3.0445  | -1.14553 |
| H  | -3.90939 | -3.2566  | 0.79345  |
| H  | -4.17737 | -1.48699 | 0.93293  |

|   |          |          |          |
|---|----------|----------|----------|
| H | -3.86185 | -2.21825 | -0.67027 |
| H | -1.01043 | 4.07235  | -0.12941 |
| H | -1.38859 | 3.0271   | 1.28296  |
| H | 0.09473  | 2.73711  | 0.34531  |
| H | -3.08448 | 3.58309  | -1.22256 |
| H | -3.60565 | 2.5609   | 0.15723  |
| H | -3.5737  | 1.87798  | -1.4972  |
| C | 2.07429  | 0.55065  | 1.39522  |
| H | 1.67448  | 1.57021  | 1.51751  |
| H | 1.74451  | -0.02829 | 2.27294  |
| C | 3.60755  | 0.57968  | 1.3012   |
| H | 4.01689  | 1.03837  | 2.2149   |
| C | 1.4811   | -0.08291 | 0.12066  |
| C | 1.92515  | 0.735    | -1.1111  |
| H | 1.52916  | 1.76055  | -1.02687 |
| H | 1.48373  | 0.28686  | -2.01571 |
| C | 4.02945  | 1.40493  | 0.07516  |
| H | 5.12927  | 1.45444  | 0.01204  |
| H | 3.6657   | 2.44165  | 0.17469  |
| C | 3.45757  | 0.76561  | -1.19991 |
| H | 3.75692  | 1.3574   | -2.07939 |
| C | 3.98698  | -0.66944 | -1.33797 |
| H | 3.59289  | -1.13061 | -2.2588  |
| H | 5.08619  | -0.66121 | -1.4252  |
| C | 4.13967  | -0.85459 | 1.16007  |
| H | 3.85932  | -1.45074 | 2.04475  |
| H | 5.24128  | -0.84655 | 1.11181  |
| C | 2.02851  | -1.51835 | -0.02033 |
| H | 1.70894  | -2.11231 | 0.85249  |
| H | 1.59264  | -1.98192 | -0.92005 |
| C | 3.5621   | -1.49258 | -0.11237 |
| H | 3.93427  | -2.52434 | -0.21271 |

Complex 9

|    |          |          |          |
|----|----------|----------|----------|
| V  | -0.36099 | 0.43382  | -0.09107 |
| Cl | -0.96059 | 0.59879  | -2.3847  |
| Cl | -0.86285 | 0.68658  | 2.24564  |
| P  | -2.9278  | -0.47978 | -0.05639 |
| P  | -1.71601 | 2.63925  | -0.02069 |
| N  | 1.13008  | 1.08848  | -0.15561 |
| N  | 0.13776  | -1.29728 | -0.00952 |
| C  | 2.44457  | 1.50851  | -0.20708 |

|   |          |          |          |
|---|----------|----------|----------|
| C | 3.20872  | 1.22965  | -1.36416 |
| C | 4.53815  | 1.64923  | -1.3939  |
| C | 5.10361  | 2.32414  | -0.31493 |
| C | 4.34203  | 2.58168  | 0.82152  |
| C | 3.00884  | 2.17757  | 0.90282  |
| C | 2.60391  | 0.4794   | -2.51549 |
| C | 2.19838  | 2.43159  | 2.14074  |
| C | 0.59271  | -2.46239 | 0.1579   |
| C | 0.58036  | -3.43961 | -1.04562 |
| C | 0.04537  | -2.72236 | -2.2911  |
| C | 1.99253  | -3.95704 | -1.38148 |
| C | -0.37397 | -4.60881 | -0.73696 |
| C | 1.05204  | -2.83643 | 1.60113  |
| C | 1.89017  | -1.66992 | 2.15609  |
| C | 1.91184  | -4.10267 | 1.73781  |
| C | -0.22591 | -3.00369 | 2.44567  |
| C | -3.65326 | -1.19592 | 1.47462  |
| C | -3.53933 | -1.64002 | -1.34426 |
| C | -3.98369 | 1.01863  | -0.36614 |
| C | -3.47644 | 2.24079  | 0.40488  |
| C | -1.86122 | 3.64527  | -1.55046 |
| C | -1.27355 | 3.91749  | 1.21944  |
| H | 5.13843  | 1.44012  | -2.28216 |
| H | 6.1452   | 2.64783  | -0.35907 |
| H | 4.78899  | 3.10297  | 1.67092  |
| H | 1.7002   | 0.9761   | -2.89447 |
| H | 3.32757  | 0.36938  | -3.33444 |
| H | 2.28456  | -0.52349 | -2.19368 |
| H | 1.25237  | 2.93814  | 1.90721  |
| H | 1.91456  | 1.48827  | 2.62949  |
| H | 2.76154  | 3.04449  | 2.85755  |
| H | 0.69153  | -1.88849 | -2.59364 |
| H | -0.01015 | -3.43916 | -3.12513 |
| H | -0.95193 | -2.29881 | -2.12678 |
| H | 2.36188  | -4.7061  | -0.67269 |
| H | 1.97323  | -4.42849 | -2.37622 |
| H | 2.71751  | -3.12883 | -1.42119 |
| H | -1.39446 | -4.23657 | -0.55476 |
| H | -0.41354 | -5.28751 | -1.60369 |
| H | -0.0708  | -5.20223 | 0.13531  |
| H | 2.25813  | -1.92734 | 3.1617   |
| H | 2.76208  | -1.47138 | 1.51269  |



|   |          |          |          |
|---|----------|----------|----------|
| H | 1.29837  | -0.75114 | 2.23155  |
| H | 1.43206  | -5.01239 | 1.35489  |
| H | 2.88957  | -3.98785 | 1.24971  |
| H | 2.10356  | -4.26816 | 2.80944  |
| H | -0.81413 | -2.07536 | 2.44073  |
| H | -0.85091 | -3.82945 | 2.06941  |
| H | 0.04195  | -3.23277 | 3.48964  |
| H | -4.73589 | -1.36452 | 1.36925  |
| H | -3.15487 | -2.15415 | 1.68376  |
| H | -3.45003 | -0.52365 | 2.31896  |
| H | -4.63791 | -1.70878 | -1.33709 |
| H | -3.18935 | -1.29207 | -2.32588 |
| H | -3.11779 | -2.63828 | -1.15702 |
| H | -3.93623 | 1.20275  | -1.45182 |
| H | -5.03438 | 0.80171  | -0.11358 |
| H | -3.49489 | 2.05176  | 1.48994  |
| H | -4.10696 | 3.12316  | 0.20857  |
| H | -2.43489 | 4.56453  | -1.3579  |
| H | -0.8509  | 3.90488  | -1.89779 |
| H | -2.34046 | 3.05305  | -2.33969 |
| H | -1.14637 | 3.43986  | 2.19928  |
| H | -0.32462 | 4.38601  | 0.92038  |
| H | -2.05353 | 4.69183  | 1.27276  |

Complex 10

|    |          |          |          |
|----|----------|----------|----------|
| Ti | 0.0214   | -0.05716 | -0.71265 |
| C  | 0.17699  | 1.29016  | 1.20295  |
| C  | -1.10862 | 0.66929  | 1.21283  |
| C  | 1.16013  | 0.26893  | 1.32473  |
| C  | -0.91675 | -0.73557 | 1.33753  |
| C  | 0.4867   | -0.98693 | 1.3769   |
| C  | 0.45838  | 2.76013  | 1.14374  |
| C  | -2.4341  | 1.36642  | 1.17604  |
| C  | 2.63174  | 0.48853  | 1.48448  |
| C  | -2.00357 | -1.75006 | 1.50947  |
| C  | 1.14349  | -2.3289  | 1.49644  |
| H  | 2.86355  | 0.65248  | 2.54935  |
| H  | 3.21139  | -0.37602 | 1.13761  |
| H  | 2.97542  | 1.36722  | 0.92292  |
| H  | 2.10159  | -2.35189 | 0.95974  |
| H  | 1.34088  | -2.56708 | 2.55355  |
| H  | 0.51014  | -3.12356 | 1.08057  |

|    |          |          |          |
|----|----------|----------|----------|
| H  | -2.29006 | -1.80259 | 2.57235  |
| H  | -2.899   | -1.49073 | 0.92935  |
| H  | -1.67906 | -2.74947 | 1.19401  |
| H  | -2.81357 | 1.51025  | 2.20045  |
| H  | -2.358   | 2.34958  | 0.6955   |
| H  | -3.18054 | 0.78265  | 0.62031  |
| H  | -0.3694  | 3.30973  | 0.67908  |
| H  | 0.6093   | 3.15791  | 2.15991  |
| H  | 1.36614  | 2.97115  | 0.56183  |
| Cl | -1.03508 | -1.8369  | -1.56808 |
| Cl | -0.88452 | 1.66965  | -1.81619 |
| Cl | 2.07102  | -0.223   | -1.59978 |

Complex 11

|    |          |          |          |
|----|----------|----------|----------|
| Ti | 1.13263  | 0.02686  | -0.57303 |
| C  | 1.76126  | -1.1767  | 1.34559  |
| C  | 2.96233  | -0.64593 | 0.77954  |
| C  | 0.9542   | -0.0842  | 1.77212  |
| C  | 2.88844  | 0.76646  | 0.83903  |
| C  | 1.63817  | 1.11902  | 1.43683  |
| C  | 1.47749  | -2.63581 | 1.54475  |
| C  | 4.13417  | -1.44493 | 0.29962  |
| C  | -0.33488 | -0.18162 | 2.52851  |
| C  | 3.97294  | 1.7195   | 0.44322  |
| C  | 1.195    | 2.51739  | 1.74793  |
| O  | -0.65119 | 0.00946  | -0.63002 |
| C  | -1.93372 | -0.01404 | -0.19498 |
| C  | -2.59168 | 1.20778  | 0.02851  |
| C  | -2.54706 | -1.25983 | 0.02367  |
| C  | -3.8598  | -1.25743 | 0.49878  |
| C  | -3.90338 | 1.15458  | 0.505    |
| C  | -4.53314 | -0.06369 | 0.74342  |
| C  | -1.79114 | -2.53482 | -0.29941 |
| H  | -4.36666 | -2.20551 | 0.68425  |
| C  | -1.88819 | 2.51172  | -0.29793 |
| H  | -4.44361 | 2.08318  | 0.69485  |
| H  | -5.55746 | -0.08323 | 1.11935  |
| C  | -1.89297 | -2.84023 | -1.79991 |
| H  | -0.72821 | -2.34677 | -0.08591 |
| C  | -2.21834 | -3.73735 | 0.54214  |
| H  | -2.19302 | -3.51179 | 1.62028  |
| H  | -3.23662 | -4.07587 | 0.29262  |

|    |          |          |          |
|----|----------|----------|----------|
| H  | -1.54121 | -4.58454 | 0.35452  |
| H  | -1.51835 | -1.99745 | -2.39836 |
| H  | -1.29587 | -3.72875 | -2.05782 |
| H  | -2.94105 | -3.02928 | -2.08376 |
| H  | -0.81744 | 2.36557  | -0.09414 |
| C  | -2.01326 | 2.81395  | -1.79737 |
| C  | -2.35725 | 3.69512  | 0.54831  |
| H  | -1.72077 | 4.57145  | 0.35256  |
| H  | -3.3925  | 3.988    | 0.31091  |
| H  | -2.30924 | 3.47143  | 1.6259   |
| H  | -1.45368 | 3.72584  | -2.05763 |
| H  | -1.60888 | 1.98731  | -2.39903 |
| H  | -3.06973 | 2.96173  | -2.0744  |
| H  | -0.12902 | -0.19593 | 3.61062  |
| H  | -1.00129 | 0.66567  | 2.32153  |
| H  | -0.89084 | -1.09459 | 2.27907  |
| H  | 0.13366  | 2.55465  | 2.02495  |
| H  | 1.77514  | 2.9186   | 2.59411  |
| H  | 1.34435  | 3.18829  | 0.88973  |
| H  | 4.70868  | 1.80654  | 1.25926  |
| H  | 4.50406  | 1.37983  | -0.45616 |
| H  | 3.57257  | 2.71938  | 0.23473  |
| H  | 4.87942  | -1.53879 | 1.10627  |
| H  | 3.83421  | -2.45424 | -0.00886 |
| H  | 4.62554  | -0.96724 | -0.559   |
| H  | 1.63403  | -3.20495 | 0.61738  |
| H  | 2.15138  | -3.04853 | 2.31212  |
| H  | 0.44646  | -2.80794 | 1.87889  |
| Cl | 1.62879  | 1.8412   | -1.83543 |
| Cl | 1.67607  | -1.72074 | -1.91082 |

#### Complex 12

|    |         |          |          |
|----|---------|----------|----------|
| Ti | 1.19564 | -0.02744 | 0.75868  |
| C  | 2.52317 | 1.17008  | -0.81111 |
| C  | 3.30222 | 0.07189  | -0.34867 |
| C  | 1.39195 | 0.64149  | -1.49702 |
| C  | 2.66212 | -1.13179 | -0.75613 |
| C  | 1.47456 | -0.77688 | -1.45746 |
| C  | 2.87756 | 2.62206  | -0.69913 |
| C  | 4.58931 | 0.15044  | 0.41649  |
| C  | 0.34605 | 1.41809  | -2.24138 |
| C  | 3.21447 | -2.51473 | -0.59517 |

|   |          |          |          |
|---|----------|----------|----------|
| C | 0.51622  | -1.71367 | -2.13185 |
| O | -0.61461 | -0.01422 | 0.78081  |
| C | -1.84775 | 0.01132  | 0.23755  |
| C | -2.49517 | -1.20794 | -0.0362  |
| C | -2.44439 | 1.25735  | -0.03384 |
| C | -3.71189 | 1.25744  | -0.6193  |
| C | -3.76132 | -1.15406 | -0.62311 |
| C | -4.3657  | 0.06481  | -0.91843 |
| C | -1.71354 | 2.52894  | 0.35933  |
| H | -4.20092 | 2.2055   | -0.84805 |
| C | -1.82596 | -2.5097  | 0.3679   |
| H | -4.28814 | -2.08129 | -0.85393 |
| H | -5.35398 | 0.08614  | -1.38057 |
| C | -1.86498 | 2.78117  | 1.86582  |
| H | -0.64233 | 2.35561  | 0.17029  |
| C | -2.12873 | 3.7571   | -0.44965 |
| H | -2.05042 | 3.57507  | -1.53263 |
| H | -3.16463 | 4.06223  | -0.23086 |
| H | -1.48077 | 4.61081  | -0.19773 |
| H | -1.50875 | 1.91733  | 2.44545  |
| H | -1.28339 | 3.66421  | 2.17562  |
| H | -2.92201 | 2.95689  | 2.12275  |
| H | -0.74469 | -2.37765 | 0.21113  |
| C | -2.03016 | -2.76356 | 1.86785  |
| C | -2.26604 | -3.71547 | -0.46145 |
| H | -1.66088 | -4.59645 | -0.19696 |
| H | -3.31931 | -3.98013 | -0.27556 |
| H | -2.14751 | -3.5304  | -1.54026 |
| H | -1.48942 | -3.66817 | 2.18879  |
| H | -1.66052 | -1.91571 | 2.46269  |
| H | -3.09961 | -2.90257 | 2.09429  |
| H | 0.5476   | 1.38313  | -3.32435 |
| H | -0.66281 | 1.01102  | -2.08032 |
| H | 0.3317   | 2.47544  | -1.94513 |
| H | -0.52228 | -1.36048 | -2.05011 |
| H | 0.75308  | -1.80064 | -3.2048  |
| H | 0.56228  | -2.72392 | -1.70249 |
| H | 3.85304  | -2.77369 | -1.45527 |
| H | 3.82651  | -2.60549 | 0.31228  |
| H | 2.41858  | -3.26984 | -0.53372 |
| H | 5.45108  | -0.03597 | -0.24437 |
| H | 4.72872  | 1.13935  | 0.87326  |

|   |         |          |          |
|---|---------|----------|----------|
| H | 4.62552 | -0.59665 | 1.22323  |
| H | 3.46404 | 2.83182  | 0.20522  |
| H | 3.47507 | 2.94104  | -1.56827 |
| H | 1.98051 | 3.25648  | -0.66209 |
| C | 1.67181 | 1.55314  | 2.04222  |
| H | 2.7457  | 1.65724  | 2.26517  |
| H | 1.29426 | 2.52163  | 1.67355  |
| H | 1.13903 | 1.32087  | 2.98234  |
| C | 1.643   | -1.66103 | 1.98401  |
| H | 2.70924 | -1.76115 | 2.24261  |
| H | 1.07391 | -1.47526 | 2.91307  |
| H | 1.29428 | -2.61791 | 1.56048  |
